# Supplementary material
Source: PubMed Central journal article supplement (PMC6716772)
Supplement: ci7b00520_si_001.pdf [file ci7b00520_si_001.pdf]

## Supporting information

# **Prediction of Ordered Water Molecules in Protein Binding Sites from Molecular Dynamics Simulations: The Impact of Ligand Binding on Hydration Networks**

*Axel Rudling<sup>1</sup>, Adolfo Orro<sup>1</sup>, and Jens Carlsson<sup>2,\*</sup>*

<sup>1</sup> Science for Life Laboratory, Department of Biochemistry and Biophysics,  
Stockholm University, SE-106 91 Stockholm, Sweden.

<sup>2</sup> Science for Life Laboratory, Department of Cell and Molecular Biology, Uppsala  
University, BMC, Box 596, SE-751 24 Uppsala, Sweden.

\*Corresponding author e-mail: [jens.carlsson@icm.uu.se](mailto:jens.carlsson@icm.uu.se).

### **Table of Contents**

|                                                               |    |
|---------------------------------------------------------------|----|
| Table S1. Protonation states of histidine residues            | S1 |
| Table S2. Summary of number of crystal structures per protein | S5 |
| Table S3. Summary of results for eight apo crystal structures | S6 |

## Supporting Tables

**Table S1.** Protonation states of histidine residues present within the simulation sphere.

| Protein                              | Residue number | Protonation |
|--------------------------------------|----------------|-------------|
| Acetylcholinesterase                 | 159            | $\delta$    |
|                                      | 170            | $\epsilon$  |
|                                      | 185            | $\delta$    |
| Coagulation factor VII               | 25             | $\delta$    |
|                                      | 48             | $\epsilon$  |
|                                      | 115            | $\delta$    |
|                                      | 132            | $\delta$    |
| Fatty acid binding protein adipocyte | 132            | $\epsilon$  |
| Heat shock protein HSP 90-alpha      | 51             | $\epsilon$  |
|                                      | 118            | $\epsilon$  |
|                                      | 151            | $\epsilon$  |
|                                      | 158            | $\epsilon$  |
| Tyrosine-protein kinase JAK2         | 6              | $\delta$    |
|                                      | 40             | $\delta$    |
|                                      | 54             | $\epsilon$  |
|                                      | 86             | $\delta$    |

|                                      |     |            |
|--------------------------------------|-----|------------|
|                                      | 105 | $\epsilon$ |
| <hr/>                                |     |            |
| Poly [ADP-ribose] polymerase-1       | 23  | $\delta$   |
|                                      | 49  | $\delta$   |
|                                      | 52  | $\epsilon$ |
|                                      | 67  | $\delta$   |
|                                      | 114 | $\delta$   |
|                                      | 137 | $\delta$   |
|                                      | 140 | $\delta$   |
|                                      | 146 | $\delta$   |
| <hr/>                                |     |            |
| Serine/threonine-protein kinase PLK1 | 52  | $\epsilon$ |
|                                      | 57  | $\epsilon$ |
|                                      | 59  | $\delta$   |
|                                      | 64  | $\delta$   |
|                                      | 86  | $\epsilon$ |
| <hr/>                                |     |            |
| Protein-tyrosine phosphatase 1B      | 10  | $\delta$   |
|                                      | 59  | $\delta$   |
|                                      | 88  | $\epsilon$ |
|                                      | 90  | $\epsilon$ |
|                                      | 113 | $\delta$   |
| <hr/>                                |     |            |
| GAR transformylase                   | 33  | $\epsilon$ |

|                               |     |                         |
|-------------------------------|-----|-------------------------|
|                               | 76  | $\epsilon$              |
|                               | 89  | $\delta$                |
|                               | 103 | $\delta$                |
|                               | 135 | $\epsilon$              |
| <hr/>                         |     |                         |
| Muscle glycogen phosphorylase | 50  | $\epsilon$              |
|                               | 55  | $\delta$                |
|                               | 67  | $\delta$                |
|                               | 78  | $\delta$                |
|                               | 87  | $\epsilon$ and $\delta$ |
|                               | 106 | $\delta$                |
|                               | 144 | $\delta$                |
|                               | 145 | $\delta$                |
| <hr/>                         |     |                         |
| Thrombin                      | 29  | $\delta$                |
|                               | 52  | $\delta$                |
|                               | 151 | $\delta$                |
| <hr/>                         |     |                         |
| Trypsin I                     | 17  | $\epsilon$              |
|                               | 31  | $\delta$                |
|                               | 53  | $\epsilon$              |

**Table S2.** Number of crystal structures of the proteins from the PDB with resolution  $\leq 2.5$  Å and an RMSD  $< 1.0$  Å to the reference structure.

| <b>Protein</b>                                    | <b>Number of structures</b> |
|---------------------------------------------------|-----------------------------|
| Acetylcholinesterase                              | 56                          |
| Coagulation factor VII                            | 53                          |
| Fatty acid binding protein adipocyte              | 25                          |
| Glutamate ionotropic receptor AMPA subunit 2      | 38                          |
| Heat shock protein HSP 90-alpha                   | 196                         |
| Tyrosine-protein kinase JAK2                      | 32                          |
| Poly [ADP-ribose] polymerase-1 <sup>a</sup>       | 16                          |
| Serine/threonine-protein kinase PLK1 <sup>a</sup> | 8                           |
| Protein-tyrosine phosphatase 1B                   | 116                         |
| GAR transformylase <sup>a</sup>                   | 19                          |
| Muscle glycogen phosphorylase                     | 167                         |
| Thrombin                                          | 215                         |
| Trypsin I                                         | 371                         |
| <b>Sum:</b>                                       | <b>1312</b>                 |

<sup>a</sup>This protein was not included in the analysis of frequently observed crystal waters because there were  $\leq 20$  crystal structures of the protein.

**Table S3.** Summary of results for eight apo crystal structures.

| Protein                                       | PDB code | Crystal waters <sup>a</sup> | Hydration sites <sup>b</sup> |
|-----------------------------------------------|----------|-----------------------------|------------------------------|
| Acetylcholinesterase                          | 1ea5     | 13 (8)                      | 19                           |
| Coagulation factor VII                        | 1klj     | 1 (0)                       | 31                           |
| Fatty acid binding protein adipocyte          | 3q6l     | 16 (14)                     | 21                           |
| Glutamate ionotropic receptor, AMPA subunit 2 | 4o3b     | 12 (10)                     | 25                           |
| Heat shock protein 90-alpha                   | 1uy1     | 15 (13)                     | 17                           |
| Protein-tyrosine phosphatase 1B               | 2cm2     | 12 (10)                     | 19                           |
| Thrombin                                      | 2uuf     | 20 (14)                     | 29                           |
| Trypsin I                                     | 1s0q     | 19 (9)                      | 26                           |
| Sum:                                          | -        | 108 (78)                    | 187                          |

<sup>a</sup> Number of waters in the binding site of the crystal structure, *i.e.* within 4 Å of both the protein and ligand (from the reference structure). The number of crystal waters that were reproduced by hydration sites is shown in parentheses.

<sup>b</sup> Number of hydration sites within 4 Å of the protein and ligand (from the reference structure).
